# Supplementary material for: An effective approach for fabricating high-strength polyurethane hydrogels with reversible photochromic performance as a photoswitch
Source: Royal Society of Chemistry journal article supplement (doi:10.1039/d1nj00429h), 2021-01-01
Supplement: d1nj00429h2.pdf [file d1nj00429h2.pdf]

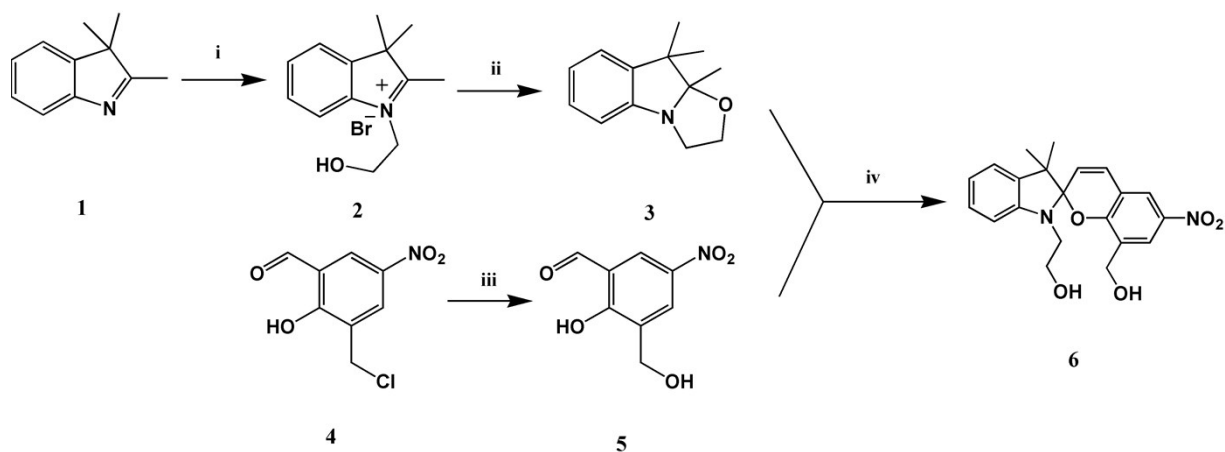

Scheme S1. Synthesis of the di-hydroxyl SP.

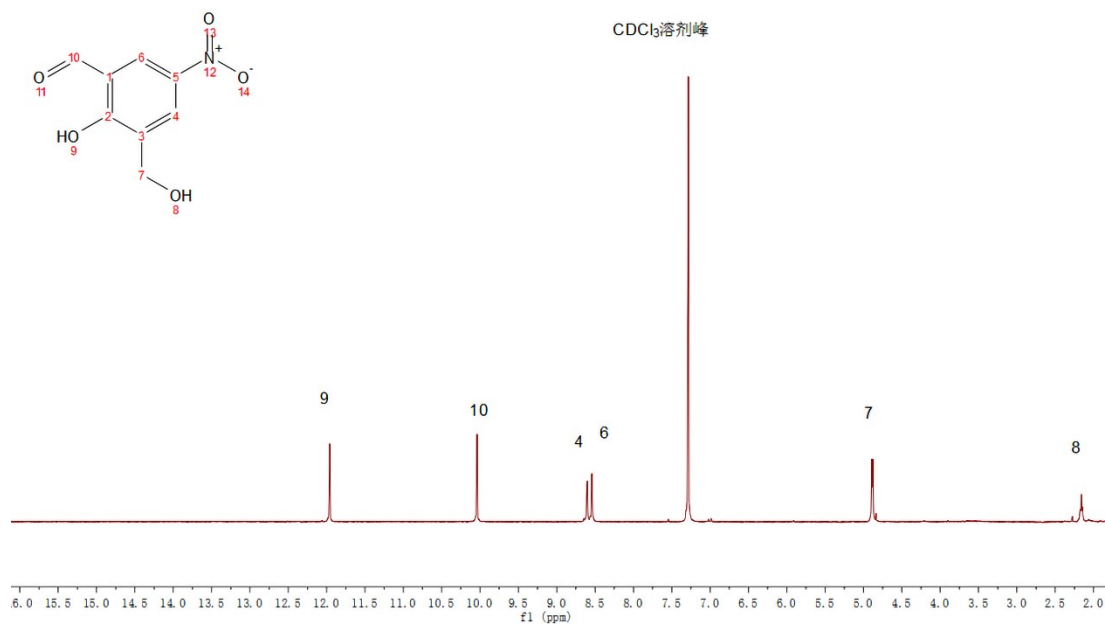

Figure S1. <sup>1</sup>H NMR of compound 5.

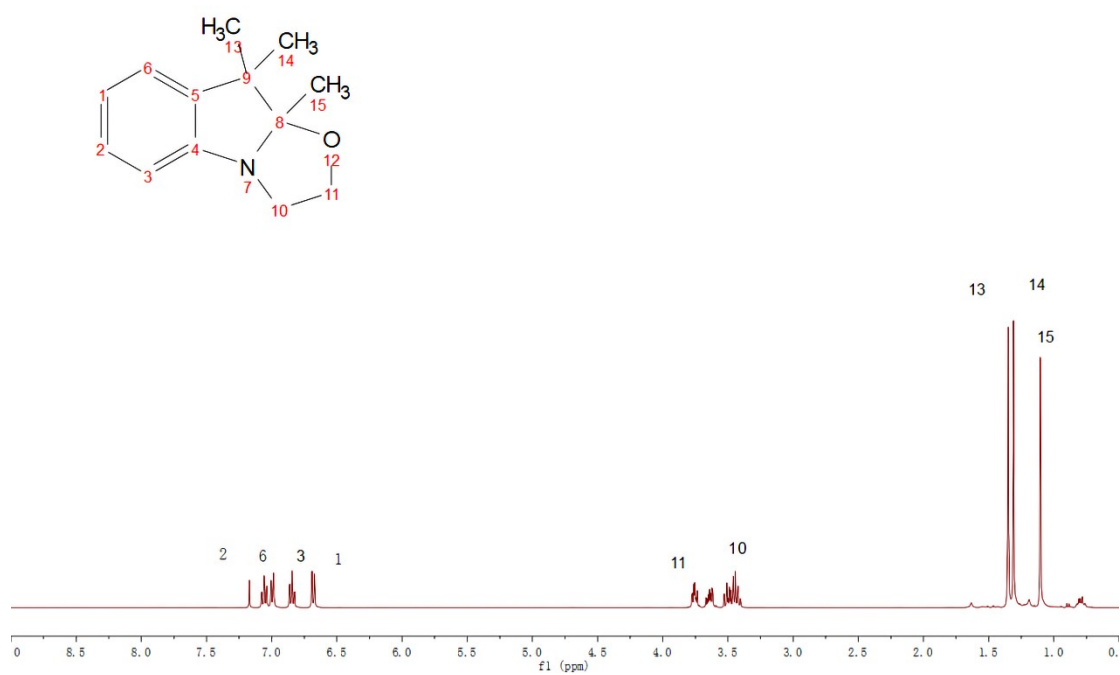

Figure S2. <sup>1</sup>H NMR of compound 3.

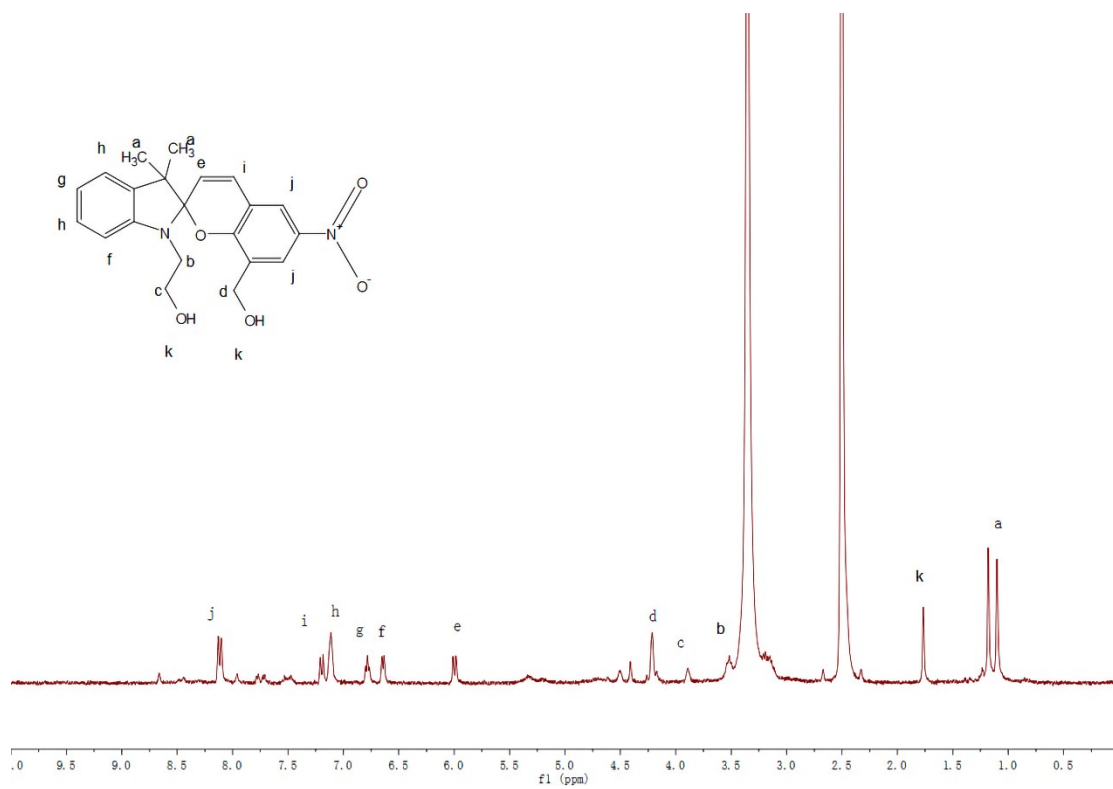

Figure S3. <sup>1</sup>H NMR of compound 6.

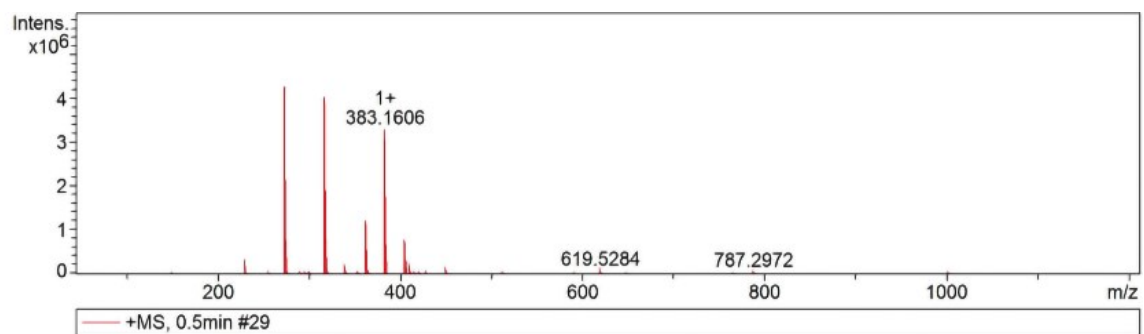

Figure S4. HRMS(ESI) spectrum of compound 6.

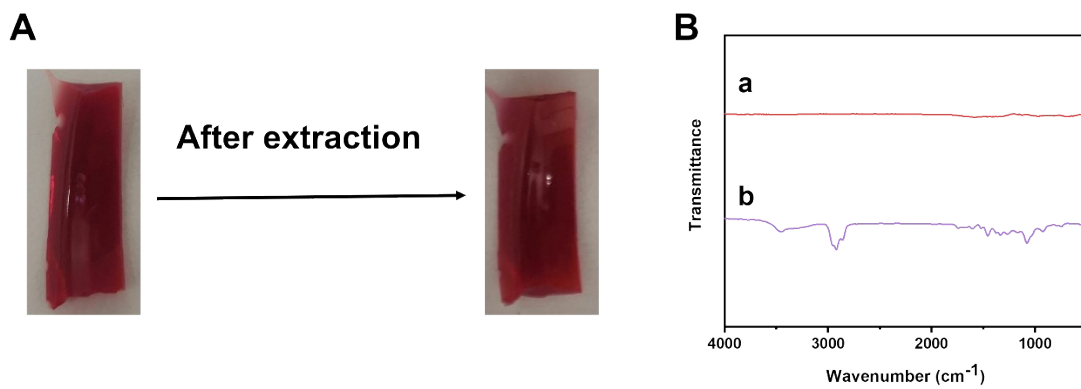

Figure S5. (A) Photo of PU-SP-4 hydrogel and (B) FT-IR spectra of (a) leaching liquor, (b) SP solution.

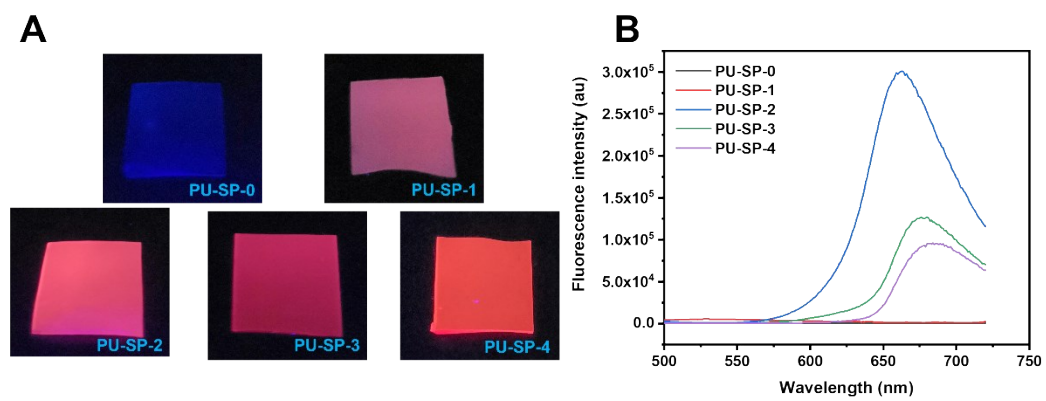

Figure S6. (A) Photos of luminous PU-SP hydrogels and (B) Fluorescence emission spectra.

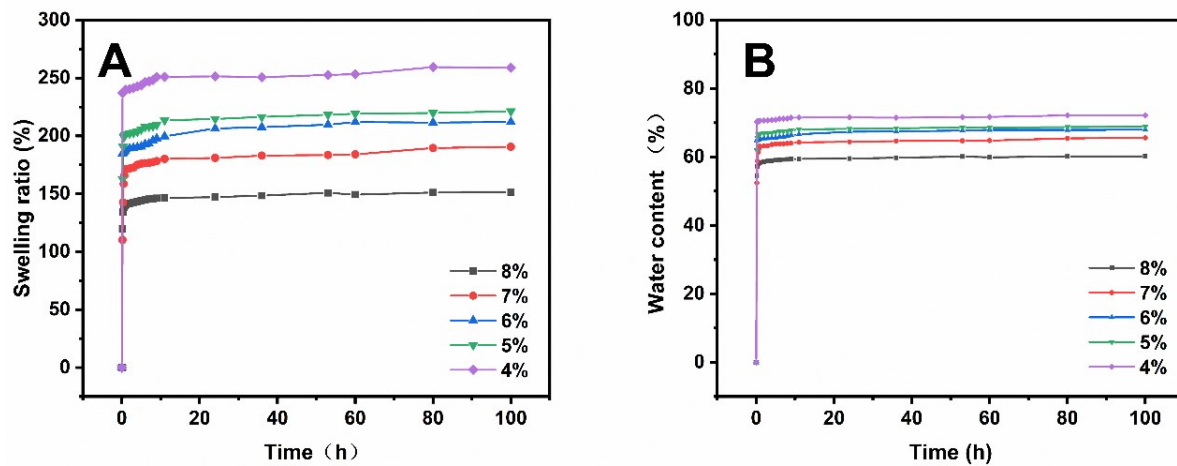

Figure S7. (A) Swelling ratio with time of PU-TMP-x; (B) Water content with time of PU-TMP-x.



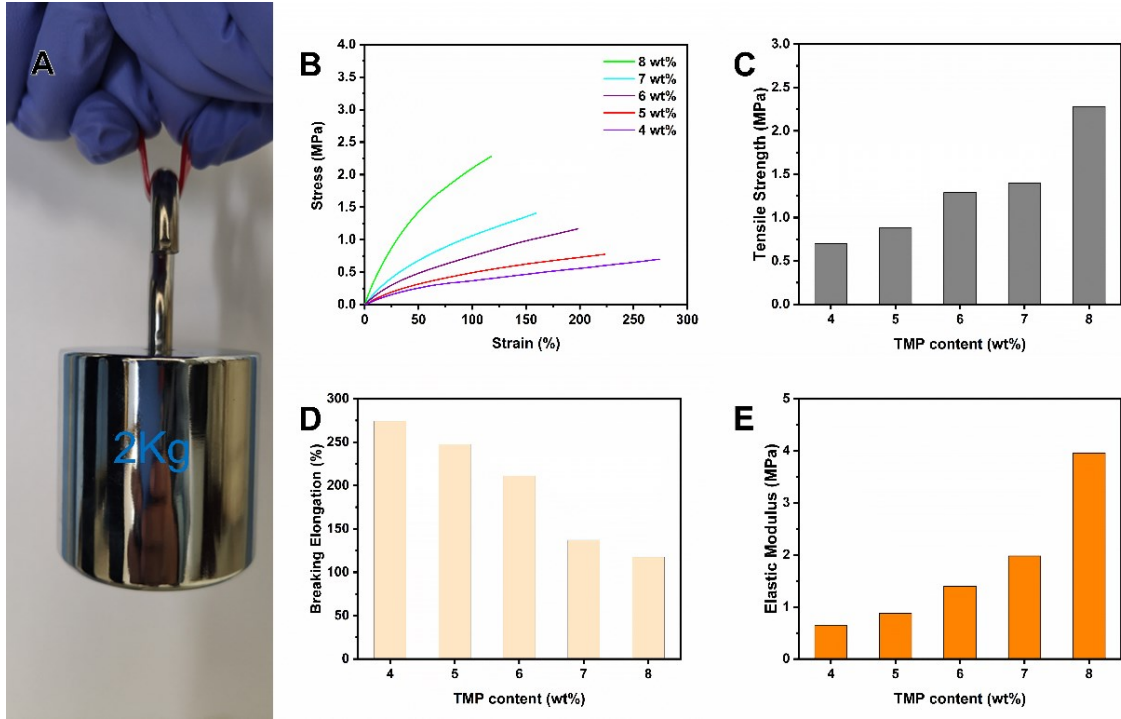

Figure S8. (A) Photo of weight capacity (B) Tensile strain-stress curves of PU-SP hydrogels; Mechanical properties of PU-SP hydrogels: (C) Tensile strength; (D) Breaking strain; (E) Elastic modulus.

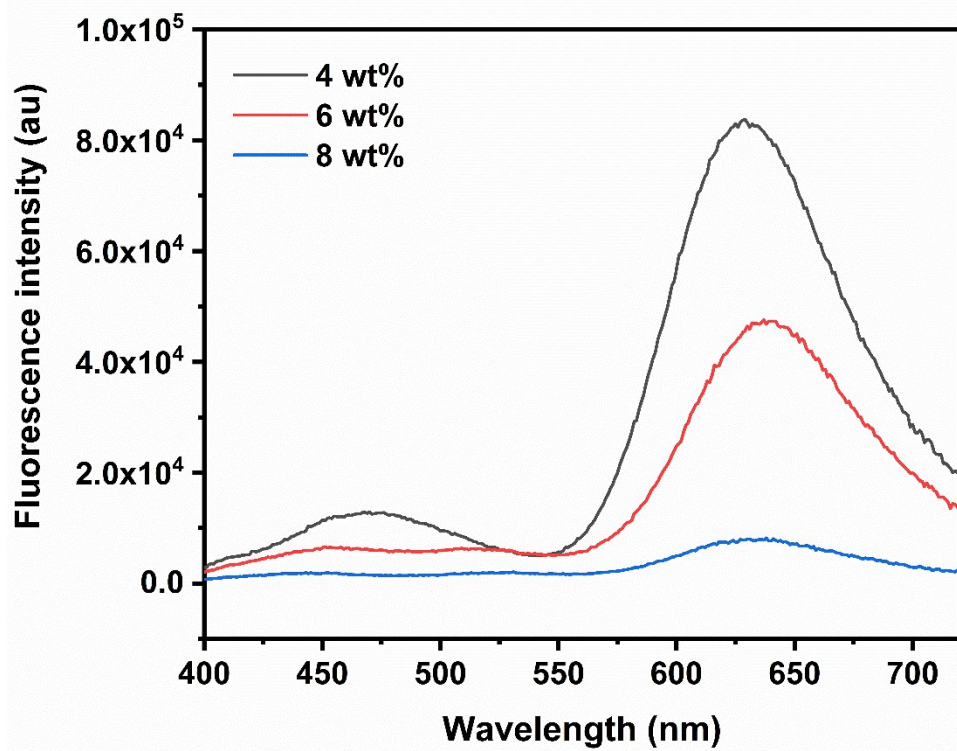

Figure S9. Fluorescence spectra of PU-TMP hydrogels.
